# Supplementary material for: Subacute Testicular Toxicity to Cadmium Exposure Intraperitoneally and Orally
Source: Hindawi journal article supplement (doi:10.1155/2019/3429635), 2019-11-25
Supplement: f1 [file 3429635.f1.pdf]

1 **Supplementary Table 1.** Leydig cell morphometry of mice exposed to cadmium chloride (CdCl<sub>2</sub>)  
 2 (n = 5 animals/group).

|                                              | <b>Control</b>            | <b>I.p. SD</b>             | <b>Oral SD</b>          | <b>Oral FD</b>           |
|----------------------------------------------|---------------------------|----------------------------|-------------------------|--------------------------|
| Nuclear diameter (μm)                        | 5.01 ± 0.23               | 4.98 ± 0.25                | 5.21 ± 0.30             | 5.09 ± 0.15              |
| LSI (%)                                      | 0.039 ± 0.004             | 0.045 ± 0.007              | 0.043 ± 0.011           | 0.034 ± 0.004            |
| Nuclear volume (μm <sup>3</sup> )            | 66.37 ± 9.43              | 64.88 ± 9.42               | 74.87 ± 13.16           | 69.15 ± 5.88             |
| Cytoplasmic volume (μm <sup>3</sup> )        | 316.06 ± 92.76            | 294.72 ± 40.04             | 268.46 ± 43.01          | 273.92 ± 51.76           |
| Cell volume (μm <sup>3</sup> )               | 382.43 ± 102.13           | 359.60 ± 49.31             | 343.33 ± 55.66          | 343.07 ± 57.06           |
| Leydig volume/g testis (mL)                  | 0.068 ± 0.008             | 0.082 ± 0.011              | 0.074 ± 0.008           | 0.069 ± 0.004            |
| Number of cells (×10 <sup>6</sup> )          | 41.17 ± 9.43              | 49.28 ± 4.91               | 41.01 ± 4.38            | 37.29 ± 7.31             |
| Number of cells/g testis (×10 <sup>6</sup> ) | 191.10 ± 52.89            | 227.82 ± 10.13             | 215.50 ± 33.39          | 205.98 ± 35.80           |
| Testosterone (ng/dL)                         | 946.21 59.64 <sup>a</sup> | 942.84 242.98 <sup>a</sup> | 64.26 5.82 <sup>b</sup> | 53.21 17.79 <sup>b</sup> |

3 Mean ± SDM (standard deviation of the mean); Control = Distilled Water; I.p. SD = CdCl<sub>2</sub>  
 4 Intraperitoneal Single Dose; Oral SD = CdCl<sub>2</sub> Oral Single Dose; Oral FD = CdCl<sub>2</sub> Oral  
 5 Fractionated Dose. LSI = Leydigosomatic index. <sup>ab</sup>Different letters in the same row, for each  
 6 evaluated time, indicate significant differences by Student test Newman Keuls (p≤0.05).

7  
 8  
 9  
 10  
 11  
 12  
 13  
 14  
 15  
 16  
 17  
 18  
 19
